# Supplementary material
Source: publisher figshare collection journal article supplement (https://rs.figshare.com/ndownloader/files/14050475)
Supplement: Supplementary file 1 [file 14050475]

## Sheet: 3.1
Table S3.1: Official gene sets from whole genome projects of four reference species used for transcript orthology assessment, including the source, version and number of genes.
Species with acronym	OGS version	Gene count	Source	Date of download	File	URL
Ephemera danica (EDAN)	0.5.3	19557	i5K consortium	2015-11-07	cds sequences	ftp://ftp.hgsc.bcm.edu/I5K-pilot/Mayfly/maker_annotation/version_0.5.3/EDAN.CDS.fna
				2015-11-07	protein sequences	ftp://ftp.hgsc.bcm.edu/I5K-pilot/Mayfly/maker_annotation/version_0.5.3/EDAN.faa
Ladona fulva (LFULV)	0.5.3	19768	i5K consortium	2015-11-07	cds sequences	ftp://ftp.hgsc.bcm.edu/I5K-pilot/Scarce_Chaser/maker_annotation/version_0.5.3/LFUL.CDS.fna
				2015-11-07	protein sequences	ftp://ftp.hgsc.bcm.edu/I5K-pilot/Scarce_Chaser/maker_annotation/version_0.5.3/LFUL.faa
Rhodnius prolixus (RPRO)	RproC1.2	15860	Vectorbase	2015-11-07	cds sequences	https://www.vectorbase.org/downloads?field_organism_taxonomy_tid=393&field_download_file_type_tid=463&field_download_file_format_tid=All&field_status_value=All
				2015-11-07	protein sequences	https://www.vectorbase.org/downloads?field_organism_taxonomy_tid=393&field_download_file_type_tid=463&field_download_file_format_tid=All&field_status_value=All
Zootermopsis nevadensis (ZNEV)	2.2	15426	Termitegenome consortium	2015-11-07	cds sequences	http://termitegenome.org/?q=consortium_datasets
				2015-11-07	protein sequences	http://termitegenome.org/?q=consortium_datasets

## Sheet: 3.2
Table S3.2: Orthograph statistics. Number of orthologous sequence clusters used for each species for which transcripts were identified; non-overlapping transcripts identified for one sequence cluster were concatenated.
Order	Group 1	Group 2	Genus	Species epithet	Number of identified orthologs
Blattodea	"Ectobiidae"	Blattellinae	Asiablatta	kyotensis	1885
Blattodea	"Ectobiidae"	Blattellinae	Blattella	germanica	2862
Blattodea	"Ectobiidae"	Blattellinae	Episymploce	sundaica	1923
Blattodea	"Ectobiidae"	Blattellinae	Loboptera	decipiens	1982
Blattodea	"Ectobiidae"	Blattellinae	Lobopterella	dimidiatipes	2149
Blattodea	"Ectobiidae"	Blattellinae	Paratemnopteryx	couloniana	2061
Blattodea	"Ectobiidae"	Blattellinae	Symploce	sp.	2000
Blattodea	"Ectobiidae"	Blattellinae	Ischnoptera	deropeltiformis	2251
Blattodea	"Ectobiidae"	-	Anallacta	methanoides	1842
Blattodea	"Ectobiidae"	Ectobiinae	Ectobius	sylvestris	1916
Blattodea	"Ectobiidae"	Nyctiborinae	Nyctibora	sp.	2000
Blattodea	"Ectobiidae"	Pseudophyllodromiinae	Balta	vilis	2728
Blattodea	"Ectobiidae"	Pseudophyllodromiinae	Cariblatta	sp.	2000
Blattodea	"Ectobiidae"	Pseudophyllodromiinae	Ellipsidion	sp.	2000
Blattodea	"Ectobiidae"	Pseudophyllodromiinae	Euthlastoblatta	diaphana	2245
Blattodea	"Ectobiidae"	Pseudophyllodromiinae	Sundablatta	sexpunctata	2962
Blattodea	"Ectobiidae"	Pseudophyllodromiinae	Supella	longipalpa	2763
Blattodea	Blaberidae	Blaberinae	Blaberus	atropos	2181
Blattodea	Blaberidae	Diplopterinae	Diploptera	punctata	1679
Blattodea	Blaberidae	Gyninae	Gyna	lurida	1764
Blattodea	Blaberidae	Oxyhaloinae	Nauphoeta	cinerea	2285
Blattodea	Blaberidae	Oxyhaloinae	Princisia	vanwaerebeki	2035
Blattodea	Blaberidae	Panchlorinae	Panchlora	nivea	2164
Blattodea	Blaberidae	Zetoborinae	Schultesia	lampyridiformis	2849
Blattodea	Blattidae	Archiblattinae	Catara	rugosicollis	2196
Blattodea	Blattidae	Blattinae	Deropeltis	erythrocephala	2312
Blattodea	Blattidae	Blattinae	Periplaneta	americana	2586
Blattodea	Blattidae	Blattinae	Shelfordella	lateralis	2691
Blattodea	Blattidae	Polyzosteriinae	Eurycotis	floridana	1982
Blattodea	Blattidae	Polyzosteriinae	Methana	parva	2050
Blattodea	Corydioidea	Corydiinae	Ergaula	capucina	2255
Blattodea	Corydioidea	Corydiinae	Eucorydia	yasumatsui	2358
Blattodea	Corydioidea	Corydiinae	Polyphaga	aegyptiaca	2171
Blattodea	Corydioidea	Corydiinae	Therea	bernhardti	2043
Blattodea	Corydioidea	Tiviinae	Tivia	sp.	2000
Blattodea	Corydioidea	Nocticolinae	Nocticola	sp.	2000
Blattodea	Cryptocercidae	Cryptocercinae	Cryptocercus	wrighti	2903
Blattodea	Isoptera	Kalotermitidae	Incisitermes	marginipennis	2437
Blattodea	Isoptera	Mastotermitidae	Mastotermes	darwiniensis	2791
Blattodea	Isoptera	Rhinotermitidae	Prorhinotermes	simplex	2986
Blattodea	Isoptera	Rhinotermitidae	Reticulitermes	santonensis	2269
Blattodea	Isoptera	Termitidae / Termitinae	Coptotermes	sp.	2000
Blattodea	Isoptera	Termopsidae	Zootermopsis	nevadensis	3247
Blattodea	Lamproblattidae	Lamproblattinae	Lamproblatta	albipalpus	2741
Blattodea	Tryonicidae	Tryonicinae	Tryonicus	parvus	2385
Dermaptera	Diplatyidae	-	Diplatys	sp.	2000
Dermaptera	Forficulidae	-	Forficula	auricularia	2698
Embioptera	Clothodidae	-	Antipaluria	urichi	2422
Embioptera	Oligotomidae	-	Haploembia	palaui	2643
Grylloblattodea	Grylloblattidae	-	Galloisiana	yuasai	2736
Grylloblattodea	Grylloblattidae	-	Grylloblatta	bifratrilecta	2356
Mantodea	Empusidae	-	Empusa	pennata	2391
Mantodea	Mantoididae	-	Mantoida	sp.	2000
Mantodea	Metallyticidae	-	Metallyticus	splendidus	2510
Mantophasmatodea	Mantophasmatidae	-	Mantophasma	sp.	2000
Mantophasmatodea	Tanzaniophasmatidae	-	Tanzaniophasma	sp.	2000
Orthoptera / Caelifera	Pyrgomorphidae	-	Aularches	miliaris	2430
Orthoptera / Caelifera	Tridactylidae	-	Xya	variegata	2785
Orthoptera / Ensifera	Phalangopsidae	-	Phaeophilacris	bredoides	2613
Orthoptera / Ensifera	Gryllacrididae	-	Nippancistroger	testaceus	2757
Phasmatodea	Bacillidae	-	Antongilia	madagassa	1975
Phasmatodea	Heteropterygidae	-	Orestes	mouhotii	2560
Phasmatodea	Timematidae	-	Timema	cristinae	2189
Plecoptera	Eustheniidae	-	Cosmioperla	kuna	1848
Plecoptera	Nemouridae	-	Protonemura	ausonia	2779
Zoraptera	Zorotypidae	-	Zorotypus	caudelli	2657
